# Supplementary material for: Genes deregulated in giant cell arteritis by Nanostring nCounter gene expression profiling in temporal artery biopsies
Source: PubMed Central journal article supplement — RMD Open. 2024 Sep 24;10(3):e004600. doi: 10.1136/rmdopen-2024-004600 (PMC11423731; doi:10.1136/rmdopen-2024-004600), 2024-09-24

## SUPPLEMENTARY MATERIAL

**Supplementary Table 2.** Comparison of Nanostring nCounter gene expression data with published DNA methylation data in TABs. Transcripts were considered up-regulated or down-regulated with fold changes in normalized expression between TMI and normal TABs  $> 2.0$  or  $< -2.0$  and Benjamini-Yekutieli adjusted p-values  $< 0.05$ . CpG sites were considered differentially methylated between TMI and normal TABs with  $\Delta\beta > |0.20|$  and p-values  $< 0.05$ . Only genes exclusively associated with hypomethylated or hypermethylated CpG sites were included in the analysis.

| Up-regulated genes with reported hypomethylated CpG sites | Up-regulated genes with reported hypomethylated CpG sites | Down-regulated genes with reported hypermethylated CpG sites | Up-regulated genes with reported hypermethylated CpG sites |
|-----------------------------------------------------------|-----------------------------------------------------------|--------------------------------------------------------------|------------------------------------------------------------|
| AMICA1                                                    | IRF1                                                      | ABL1                                                         | ATG7                                                       |
| BATF                                                      | IRF5                                                      | CLU                                                          | CD37                                                       |
| BID                                                       | IRF8                                                      | CX3CL1                                                       | HLA-DPB1                                                   |
| BTLA                                                      | ITGA4                                                     | FEZ1                                                         | JAK3                                                       |
| C1QB                                                      | ITGAL                                                     | IGF1R                                                        | NLRP3                                                      |
| C3AR1                                                     | ITGB2                                                     | ITGA1                                                        | POU2F2                                                     |
| CASP8                                                     | ITK                                                       | JAM3                                                         | SBNO2                                                      |
| CCL18                                                     | LAG3                                                      | LRRN3                                                        |                                                            |
| CCL22                                                     | LAMP3                                                     | PDGFRB                                                       |                                                            |
| CCL5                                                      | LTA                                                       | RRAD                                                         |                                                            |
| CCR2                                                      | LTB                                                       | TGFB2                                                        |                                                            |
| CCR5                                                      | LY9                                                       |                                                              |                                                            |
| CCR7                                                      | MS4A1/CD20                                                |                                                              |                                                            |
| CD163                                                     | MSR1                                                      |                                                              |                                                            |
| CD28                                                      | NCF4                                                      |                                                              |                                                            |
| CD3D                                                      | NLRC5                                                     |                                                              |                                                            |
| CD3E                                                      | PIK3CG                                                    |                                                              |                                                            |
| CD4                                                       | PRF1                                                      |                                                              |                                                            |
| CD44                                                      | PSMB8                                                     |                                                              |                                                            |
| CD5                                                       | PSMB9                                                     |                                                              |                                                            |
| CD53                                                      | PTPRC/CD45                                                |                                                              |                                                            |
| CD74                                                      | RIPK2                                                     |                                                              |                                                            |
| CD80                                                      | SELPLG                                                    |                                                              |                                                            |
| CD84/SLAMF5                                               | SH2D1A                                                    |                                                              |                                                            |
| CD96                                                      | SLAMF1                                                    |                                                              |                                                            |
| CTLA4                                                     | SLAMF6                                                    |                                                              |                                                            |
| CXCR3                                                     | SLAMF7                                                    |                                                              |                                                            |
| CXCR6                                                     | SPN                                                       |                                                              |                                                            |
| DUSP4                                                     | STAT1                                                     |                                                              |                                                            |
| FYN                                                       | STAT4                                                     |                                                              |                                                            |
| GZMA                                                      | TAP1                                                      |                                                              |                                                            |
| HAVCR2                                                    | TAP2                                                      |                                                              |                                                            |
| HLA-A                                                     | TCF7                                                      |                                                              |                                                            |
| HLA-DMA                                                   | TLR1                                                      |                                                              |                                                            |
| HLA-DMB                                                   | TNF                                                       |                                                              |                                                            |
| HLA-DPA1                                                  | TNFRSF1B                                                  |                                                              |                                                            |
| HLA-DRA                                                   | TNFRSF4/OX40                                              |                                                              |                                                            |
| IL10RA                                                    | TNFRSF9/4-1BB                                             |                                                              |                                                            |
| IL12RB1                                                   | TNFSF14                                                   |                                                              |                                                            |
| IL17RA                                                    | TNFSF8                                                    |                                                              |                                                            |
| IL2RA                                                     | ZAP70                                                     |                                                              |                                                            |
| IL2RG                                                     |                                                           |                                                              |                                                            |
| INPP5D                                                    |                                                           |                                                              |                                                            |
| IRAK2                                                     |                                                           |                                                              |                                                            |

**Supplementary Table 3.** Comparison of Nanostring nCounter gene expression data with published RNA sequencing data in TABs. Transcripts were considered up-regulated or down-regulated with fold changes between TABs with TMI and normal TABs > 2.0 or < -2.0 and adjusted p-values < 0.05.

| <b>Up-regulated genes in TMI both by Nanostring nCounter and RNA sequencing</b> | <b>Up-regulated genes in TMI both by Nanostring nCounter and RNA sequencing</b> | <b>Up-regulated genes in TMI both by Nanostring nCounter and RNA sequencing</b> | <b>Down-regulated genes in TMI both by Nanostring nCounter and RNA sequencing</b> |
|---------------------------------------------------------------------------------|---------------------------------------------------------------------------------|---------------------------------------------------------------------------------|-----------------------------------------------------------------------------------|
| APOE                                                                            | CTLA4                                                                           | LCP1                                                                            | CCL14                                                                             |
| BLNK                                                                            | CTSH                                                                            | LILRB2                                                                          | CFD                                                                               |
| C1QA                                                                            | CTSS                                                                            | MARCO                                                                           | CLU                                                                               |
| C1QB                                                                            | CXCL10                                                                          | MS4A1/CD20                                                                      | CX3CL1                                                                            |
| C3AR1                                                                           | CXCR4                                                                           | NCF4                                                                            | ITGB4                                                                             |
| CASP1                                                                           | CYBB                                                                            | NLRC5                                                                           | MCAM                                                                              |
| CASP8                                                                           | DUSP4                                                                           | PDCD1LG2/PD-L2                                                                  |                                                                                   |
| CCL18                                                                           | FCER1G                                                                          | PIK3CD                                                                          |                                                                                   |
| CCL19                                                                           | FCGR2B                                                                          | PIK3CG                                                                          |                                                                                   |
| CCL3                                                                            | FCGR3A                                                                          | PLAU                                                                            |                                                                                   |
| CCL4                                                                            | HCK                                                                             | PLAUR                                                                           |                                                                                   |
| CD14                                                                            | HLA-A                                                                           | POU2F2                                                                          |                                                                                   |
| CD163                                                                           | HLA-B                                                                           | PSMB9                                                                           |                                                                                   |
| CD2                                                                             | HLA-C                                                                           | PTPRC/CD45                                                                      |                                                                                   |
| CD209                                                                           | HLA-DMB                                                                         | PYCARD                                                                          |                                                                                   |
| CD247                                                                           | HLA-DPB1                                                                        | RUNX1                                                                           |                                                                                   |
| CD33                                                                            | HLA-DRA                                                                         | SIGIRR                                                                          |                                                                                   |
| CD37                                                                            | IL12RB1                                                                         | SLAMF7                                                                          |                                                                                   |
| CD3D                                                                            | IL15RA                                                                          | SLC11A1                                                                         |                                                                                   |
| CD3E                                                                            | IL16                                                                            | SPN                                                                             |                                                                                   |
| CD44                                                                            | IL17RA                                                                          | SPP1                                                                            |                                                                                   |
| CD53                                                                            | IL1RN                                                                           | STAT1                                                                           |                                                                                   |
| CD6                                                                             | IL21R                                                                           | SYK                                                                             |                                                                                   |
| CD68                                                                            | IL32                                                                            | TAP2                                                                            |                                                                                   |
| CD7                                                                             | IRAK1                                                                           | TAPBP                                                                           |                                                                                   |
| CD74                                                                            | IRF1                                                                            | TBX21                                                                           |                                                                                   |
| CD83                                                                            | IRF3                                                                            | TCF7                                                                            |                                                                                   |
| CD84/SLAMF5                                                                     | IRF5                                                                            | TIGIT                                                                           |                                                                                   |
| CD8A                                                                            | IRF7                                                                            | TLR6                                                                            |                                                                                   |
| CD96                                                                            | ITGAL                                                                           | TNFAIP3                                                                         |                                                                                   |
| CFB                                                                             | ITGAM                                                                           | TNFRSF14                                                                        |                                                                                   |
| CHIT1                                                                           | ITGAX                                                                           | TNFSF13                                                                         |                                                                                   |
| CKLF                                                                            | ITGB2                                                                           | TNFSF13B                                                                        |                                                                                   |
| CLEC4A                                                                          | ITK                                                                             | TNFSF8                                                                          |                                                                                   |
| CLEC7A                                                                          | JAK3                                                                            | TREM1                                                                           |                                                                                   |
| COL3A1                                                                          | KLRB1                                                                           | VCAM1                                                                           |                                                                                   |
| CR1                                                                             | KLRK1                                                                           | ZAP70                                                                           |                                                                                   |
| CSF1R                                                                           | LCK                                                                             |                                                                                 |                                                                                   |

**Supplementary Table 4.** Characteristics of the validation cohorts of patients.

| <b>Demographic, clinical and laboratory characteristics</b> | <b>TMI</b>       | <b>ILA</b>       | <b>NEG</b>       |
|-------------------------------------------------------------|------------------|------------------|------------------|
| Number                                                      | 7                | 7                | 7                |
| Age at disease onset, median (IQR), years                   | 78 (74 – 82)     | 74 (62 – 82)     | 78 (76 – 83)     |
| Males / females, n                                          | 0 / 7            | 0 / 7            | 5 / 2            |
| Any cranial symptoms <sup>a</sup> , n (%)                   | 7 (100)          | 4 (57)           | 1 (14)           |
| Any visual symptoms <sup>b</sup> , n (%)                    | 1 (14)           | 3 (43)           | 4 (57)           |
| Systemic signs/symptoms <sup>c</sup> , n (%)                | 6 (86)           | 4 (57)           | 2 (29)           |
| Polymyalgia rheumatica, n (%)                               | 4 (57)           | 3 (43)           | 2 (29)           |
| ESR, median (IQR), mm/h                                     | 82 (81 – 88)     | 61 (35 – 82)     | 53 (27 – 66)     |
| CRP, median (IQR), mg/dl <sup>d</sup>                       | 3.8 (2.8 – 11.0) | 8.4 (1.3 – 10.9) | 2.1 ( 0.8 – 3.5) |
| Prednisone at TABs, n (%) <sup>e</sup>                      | 0 (0)            | 5 (71)           | 0 (0)            |

<sup>a</sup>At least one of the following: headache, scalp tenderness, jaw claudication.

<sup>b</sup>At least one of the following: sight loss, diplopia, amaurosis fugax.

<sup>c</sup>At least one of the following: fever, fatigue, anorexia, weight loss of at least 4 kg.

<sup>d</sup>Upper limit of the normal reference range = 0.5 mg/dl.

<sup>e</sup> 50 mg/day for 8 days; 50 mg/day for 14 days; 25 mg/day for 10 days; 25 mg/day for; 5 mg/day for 12 days.

IQR: interquartile range; TAB: temporal artery biopsy; TMI: transmural inflammation; ILA: inflammation limited to adventitia; NEG, normal temporal artery biopsies without inflammation from patients without GCA; n: number.

**Supplementary Figure 1.** Comparison of the deregulated genes in the histological patterns. The lists of deregulated genes between TMI and NEG (n = 291), TMI and ILA (n = 213), ILA and NEG (n = 42) were intersected by means of Venn diagrams. Transcripts were considered up-regulated or down-regulated with fold changes > 2.0 or < -2.0 and adjusted p-values < 0.05 (TMI vs NEG and TMI vs ILA) or p-values not corrected for multiple testing < 0.05 (ILA vs NEG). In addition genes detected in TABs with TMI or ILA but not detected in normal TABs with p < 0.05 by Fisher's exact test were included and considered up-regulated. (A) Up-regulated genes. (B) Down-regulated genes. TMI = transmural inflammation in temporal artery biopsies. ILA = inflammation limited to adventitia. NEG = normal, non-inflamed temporal artery biopsies.

**A**

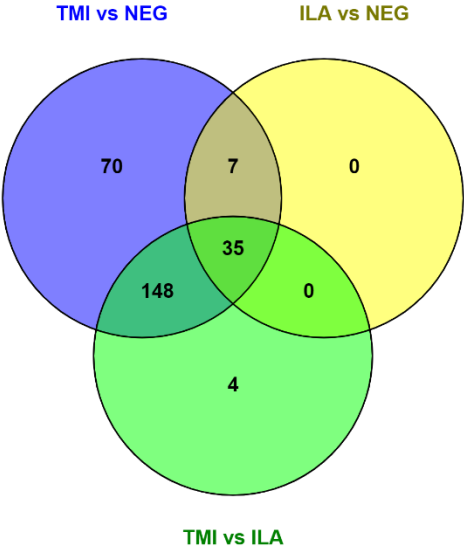

**B**

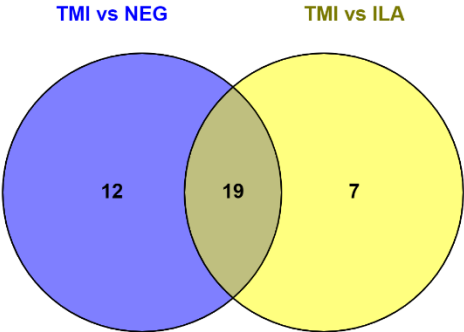

**Supplementary Figure 2.** Interactions among proteins encoded by the DEGs between TABs with TMI and normal TABs by STRING software analysis. The list of genes up-regulated plus detected/undetected (n = 260) or down-regulated (n = 31) in TMI versus normal TABs were uploaded in the STRING software. Network analysis was performed applying high confidence interaction score (=0.700) followed by k-means clustering (feasible only for the up-regulated genes). The network nodes are proteins. The edges show the predicted functional associations with up to 7 differently colored lines: red line = gene fusion evidence; green line = neighborhood evidence; blue line = co-occurrence evidence; purple line = experimental evidence; yellow line = textmining evidence; light blue line = database evidence; black line = co-expression evidence. A, B, C images show interactions among the up-regulated DEGs clustered by k-means algorithm. D shows interactions among the down-regulated DEGs.

**A**

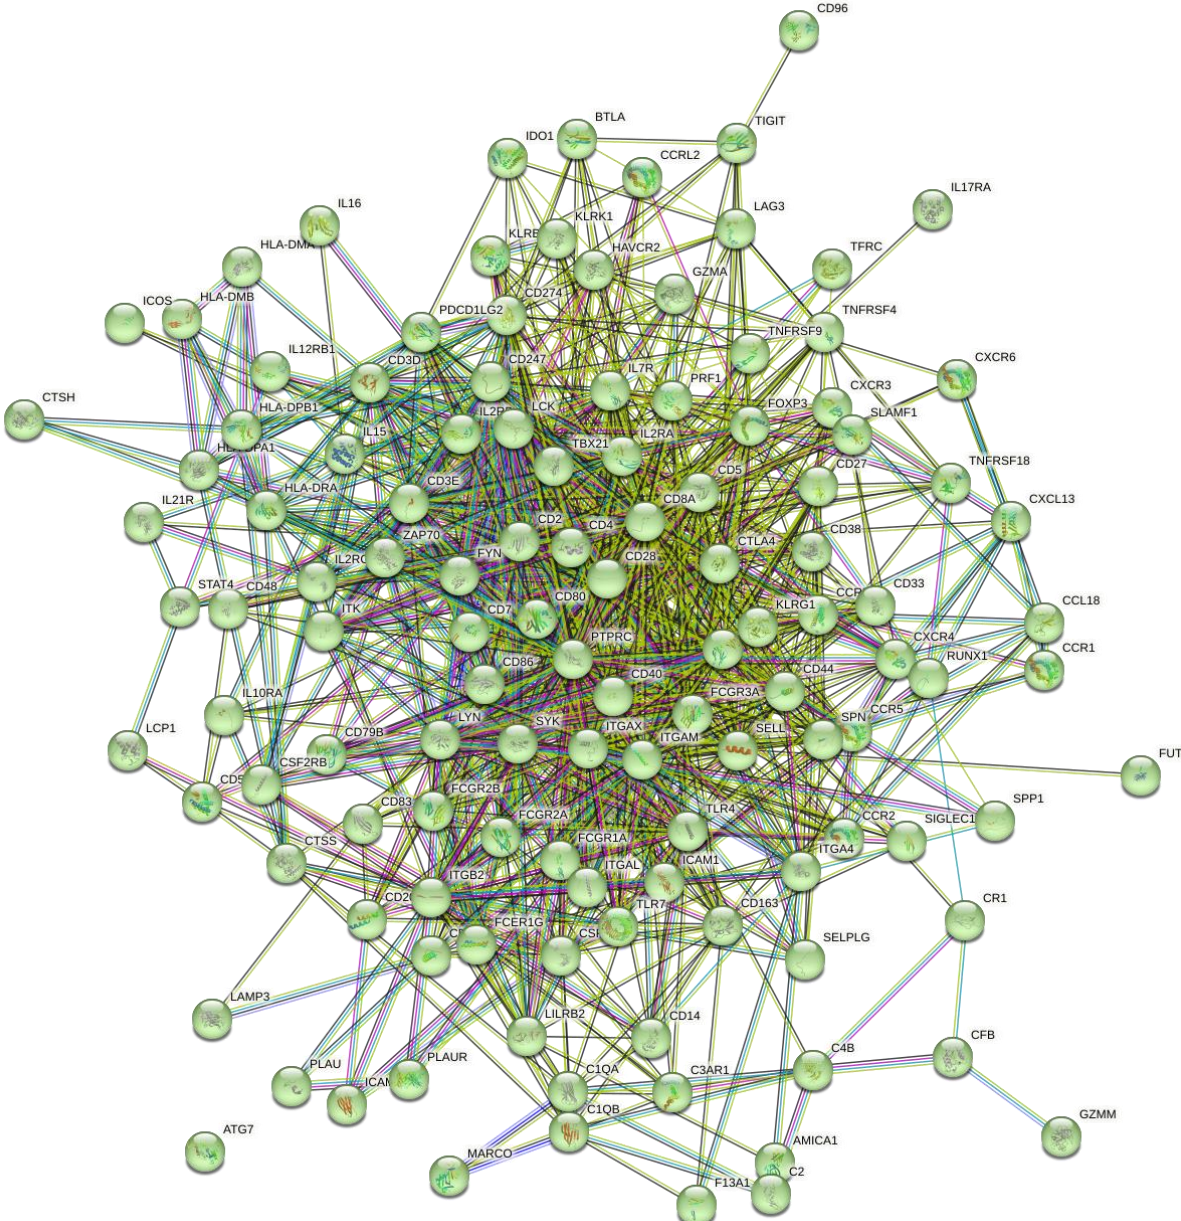

**B**

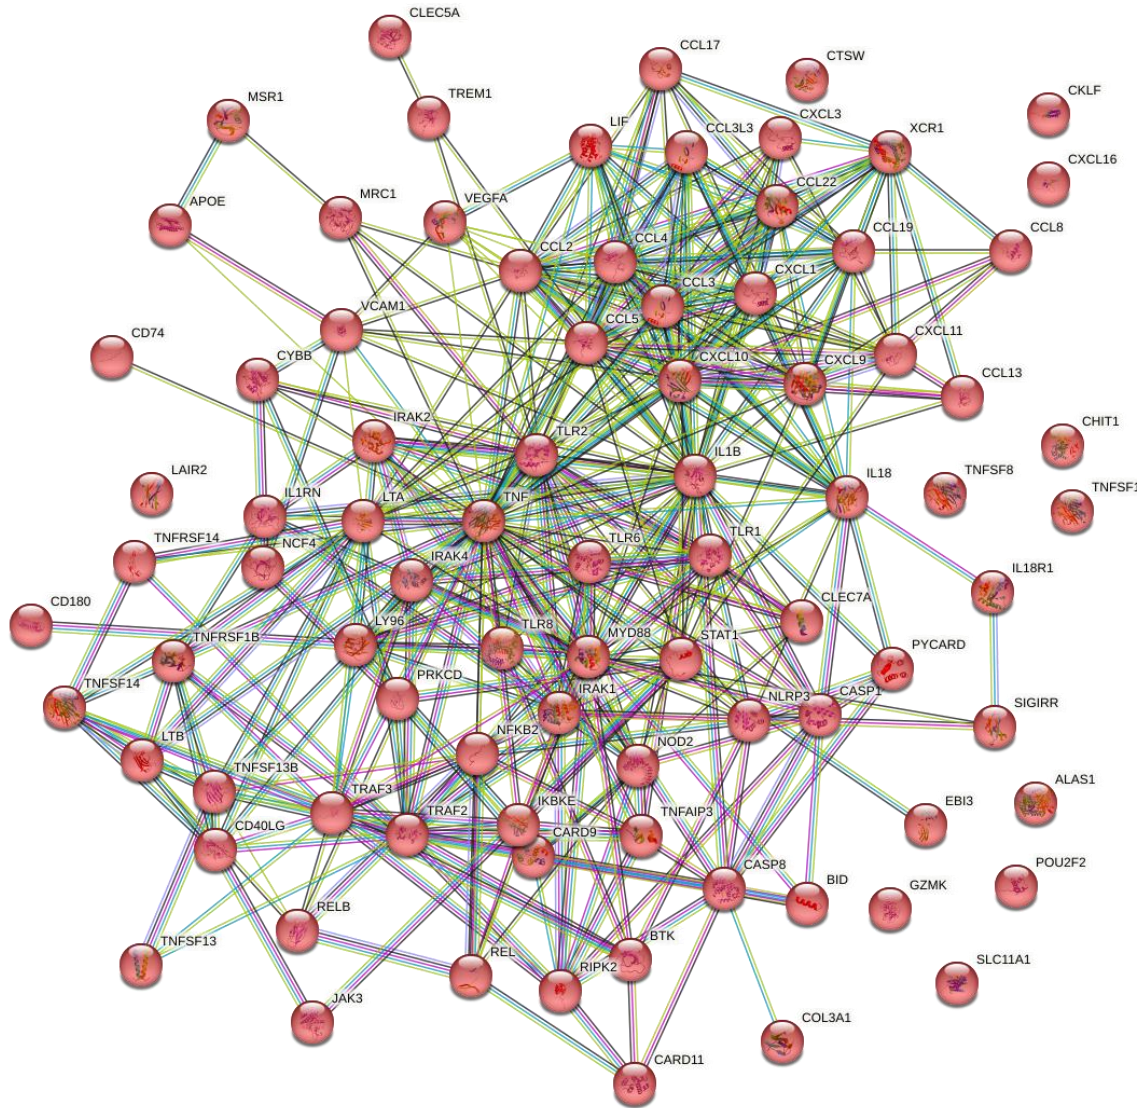

C

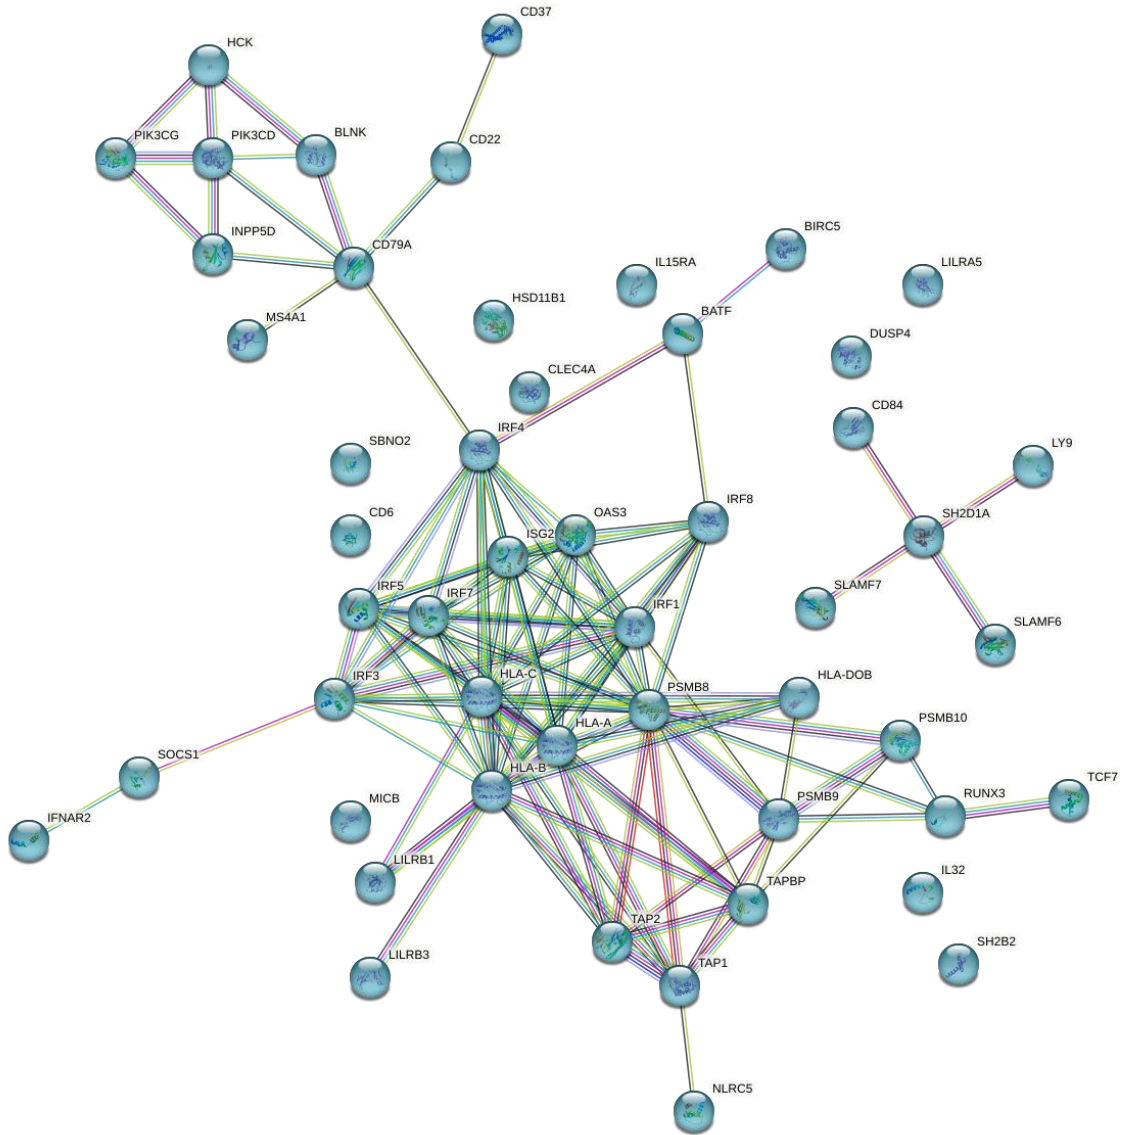

D

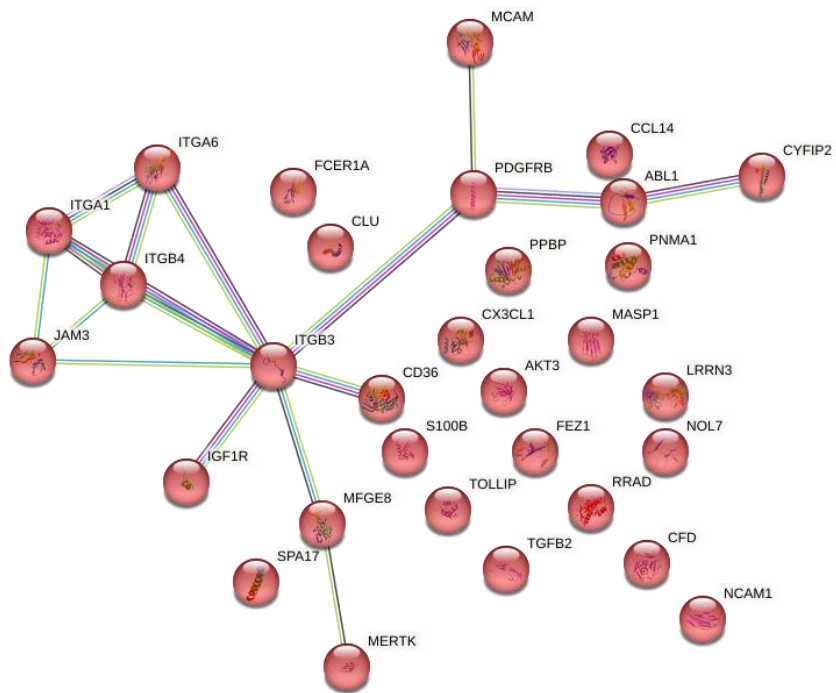



**Supplementary Figure 3.** Validation of the increased expression in TABs with TMI of some DEGs that emerged from Nanostring nCounter profiling. The expression of CD45, CCL18, TNFRSF4/OX40, TNFRSF7/CD27, TNFRSF9/4-1BB was investigated by real-time PCR in a validation cohort. Normalized gene expression ( $= 2^{-\Delta Ct}$ ) is shown. POL2RA was used as housekeeping gene. CD45 was used to evaluate the degree of infiltrating leukocytes. Normalized expression was arbitrary set = 0.001 for genes that did not show amplification. Data were analyzed by the Kruskal-Wallis test with Dunns correction (\* =  $p < 0.05$ ; \*\*\* =  $p < 0.001$ ) or Fisher's exact test (# =  $p < 0.05$ ; ### =  $p < 0.001$ ).

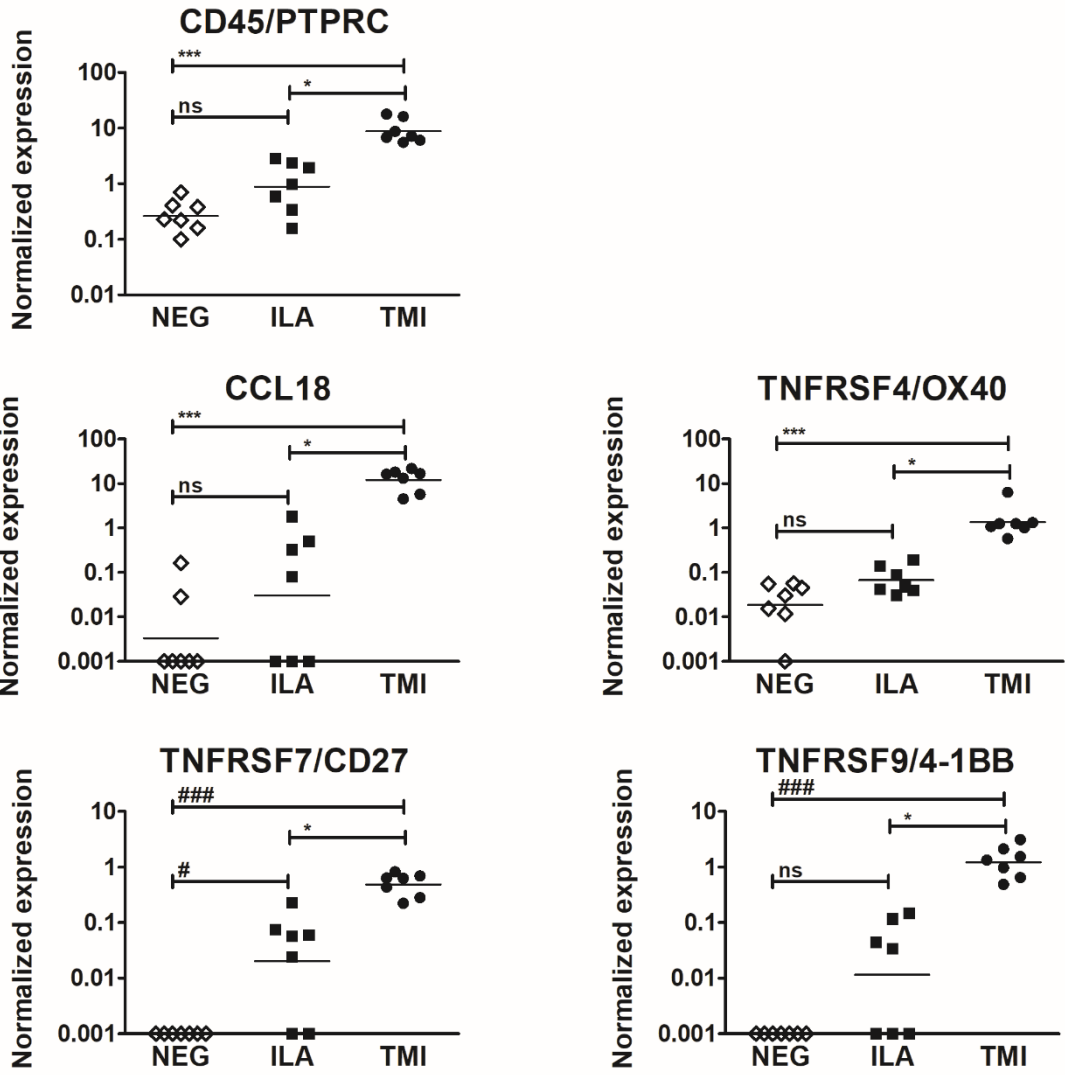

Supplement: rmdopen-10-3-s002.pdf [file rmdopen-10-3-s002.pdf]
